# Supplementary material
Source: publisher site journal article supplement (https://www.spandidos-publications.com/4302/downloadSupplementary)
Supplement: Supplementary file 1 [file downloadSupplementary]

## Sheet: Supplementary File 10
Table SX. The number of known splicing sites and novel splicing sites in the siDEK-treated cells
#Sample	All_Junction	Novel_Junction	Known_Junction
siCtrl_1st	161479	39457	122022
siCtrl_2nd	159400	40229	119171
siCtrl_3rd	178791	51585	127206
siDEK_1st	164100	41335	122765
siDEK_2nd	163818	42334	121484
siDEK_3rd	168100	44075	124025
Total	282228	132858	149370
